# Supplementary material for: Regulation of factor V and factor V-short by TFPIα: Relationship between B-domain proteolysis and binding
Source: PubMed Central journal article supplement (PMC7948760; doi:10.1074/jbc.ra120.016341), 2021-01-07
Supplement: mmc1.pdf [file mmc1.pdf]

Supporting information:

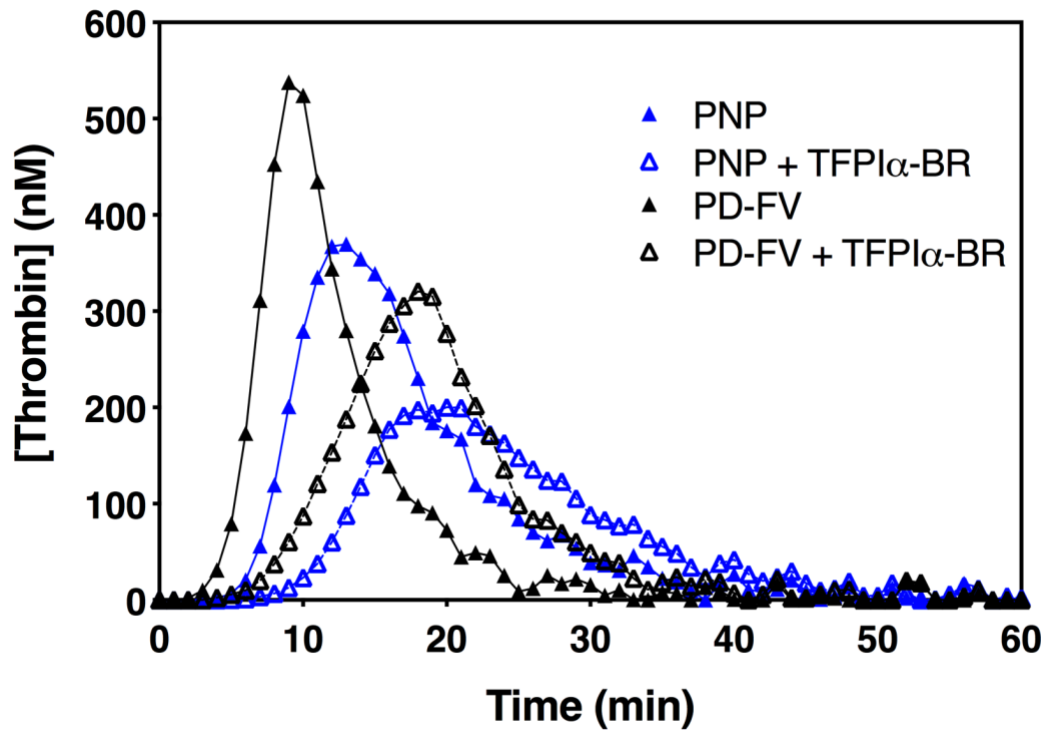

**Supporting information 1. TFPI $\alpha$ -BR blocks thrombin generation in the presence of FV.** Thrombin generation for PNP or FV-DP supplemented with 20 nM PD-FV in the presence or absence of TFPI $\alpha$ -BR (6  $\mu$ M) using 0.4 pM TF as the initiator. Data are representative of 3 independent experiments.

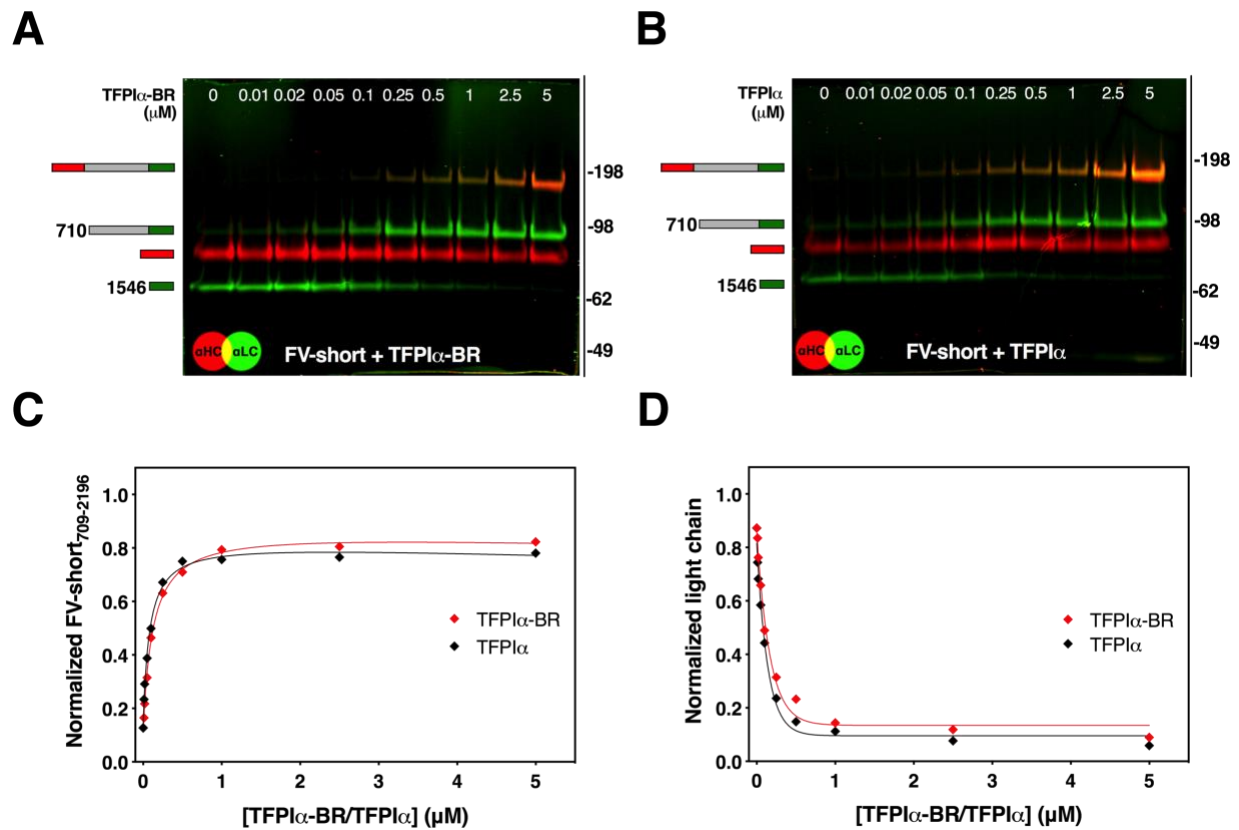

**Supporting information 2. TFPI $\alpha$ -BR or TFPI $\alpha$  delays FV-short activation by thrombin.** FV-short (20 nM) was incubated for 15 min with thrombin (0.2 nM) in the presence of increasing concentrations (0-5  $\mu$ M; indicated on the blot) of TFPI $\alpha$ -BR (A) or TFPI $\alpha$  (B). Aliquots collected after 15 minutes were subject to SDS-PAGE/western blot on 3-8% gels under reducing conditions and visualized using a mixture of labeled monoclonal antibodies against the FV-LC (green) and FV-HC (red). FV-short fragments corresponding to each band are drawn on the left side: HC (red), B-domain (grey), LC (green). Normalized intensity of the FV-short 710-2196 fragment corresponding to cleavage at Arg<sup>709</sup> (shown in C) or FV-short fragment 1546-2196 corresponding to cleavage at Arg<sup>1545</sup> (shown in D) were plotted as function of TFPI $\alpha$ -BR or TFPI $\alpha$  concentration. Data are representative of 3 similar experiments.
